# Supplementary material for: Reduced survival of Antarctic benthos linked to climate-induced iceberg scouring
Source: Springer Nature journal article supplement (doi:10.1038/nclimate1232), 2011-09-23

**Reduced survival of Antarctic benthos linked to climate-induced iceberg scouring**

David KA Barnes and Terri Souster

British Antarctic Survey, NERC, Madingley Road, Cambridge, CB3 0ET, UK [dkab@bas.ac.uk](mailto:dkab@bas.ac.uk)

Figure S1. Iceberg marker grid design at the Rothera Research Station site. Three replicate grids of 25 markers (I, II and III) were surveyed at each of three depths (5, 10 and 25 m). Markers in each grid were 1 m apart (dark red arrows) and grids were 25 m apart (light red arrow). Each marker had a unique identify (example shown in blue for the middle grid).

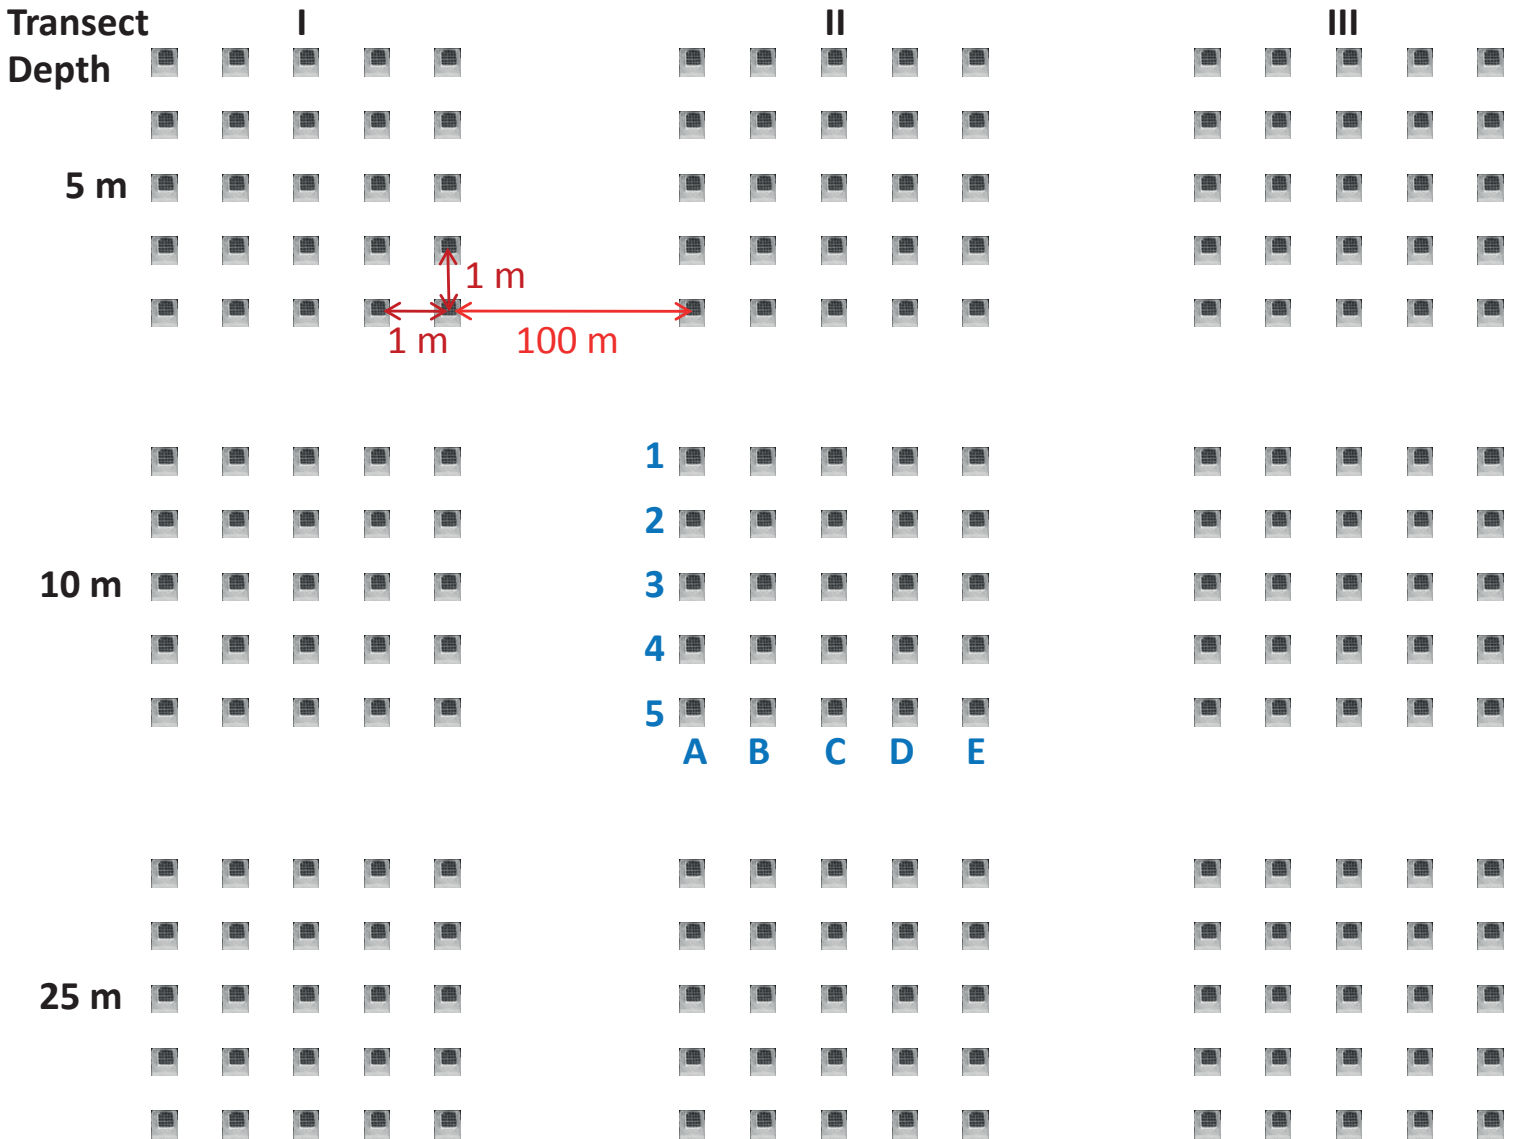

Supplement: 41558_2011_BFnclimate1232_MOESM474_ESM.pdf [file 41558_2011_BFnclimate1232_MOESM474_ESM.pdf]
